# Supplementary material for: Growth hormone receptor disrupts glucose homeostasis via promoting and stabilizing retinol binding protein 4
Source: PubMed Central journal article supplement (PMC8344001; doi:10.7150/thno.61192), 2021-07-13

## Supplementary materials

**Table S1. Characteristics of human subjects**

|                          | <b>Control</b><br>(n=6) | <b>Obesity</b><br>(n=7) |
|--------------------------|-------------------------|-------------------------|
| Age (year)               | 47.33±12.19             | 43.00±11.52             |
| Body weight (kg)         | 57.83±12.59             | 118.27±19.93***         |
| Height (cm)              | 165.67±8.85             | 167.83±10.23            |
| BMI (kg/m <sup>2</sup> ) | 20.96±3.41              | 41.84±4.89***           |
| Serum TG (mM)            | 1.03±0.30               | 2.49±0.42***            |
| Serum GH (ng/mL)         | 12.21±1.59              | 9.94±1.75*              |
| Serum IGF-1 (ng/mL)      | 377.36±43.26            | 356.93±33.91            |
| Serum Insulin (μU/mL)    | 6.23±0.97               | 15.79±1.77***           |

Data were expressed as mean ± SD. \* $p < 0.05$ , \*\*\* $p < 0.001$ , versus control group

(Student's *t*-test).

**Table S2. Primer sequences for ChIP**

| <b>ID</b> | <b>Sense Sequence (5' → 3')</b> | <b>Antisense Sequence (5' → 3')</b> |
|-----------|---------------------------------|-------------------------------------|
| non-SRE   | CTGACTATTTTCGATCAGGCT           | TTTCTTCTATGAGACGCACC                |
| CCND1-SRE | CTCAACGAAGCCAATCAAGA            | AATCGCTGCAAAGTTATTAGTCG             |
| RBP4-SRE  | TAAAAATGCATGGTAAACACTTGGC       | TGGTGCTGTTTGGGTCAATATTTAT           |
| non-HRE   | GTTGGTTTCTAAGGCTGATG            | AAGACCAGGCTAACCTTGA                 |
| VEGF-HRE  | CGAGGGTTGGCGGCAGGAC             | CAGTGGCGGGGAGTGAGACG                |
| TTR-HRE   | AGAGTGAGTTCCAGGACAGC            | TTACATAAGGATGTCCCCTGAT              |

SRE, STAT5 response elements; HRE, HIF1 $\alpha$  response elements.

**Table S3. Primer sequences for siRNA**

| <b>ID</b> | <b>Sense Sequence (5' → 3')</b> | <b>Antisense Sequence (5' → 3')</b> |
|-----------|---------------------------------|-------------------------------------|
| N.C.      | UUCUCCGAACGUGUCACGU             | ACGUGACACGUUCGGAGAA                 |
| siGHR     | ACAUAAUCAGGGCAUUCUUCCAtt        | UGGAAAGAAUGCCCUGAUUAUGUtt           |
| siSTAT5   | UGAUGUUGAACAGUUUCUGUGCCtt       | GGCACAGAAACUGUUCAACAUCAtt           |

**Table S4. Primer sequences for qRT-PCR**

| <b>Gene</b>                     | <b>Sense Sequence (5' → 3')</b> | <b>Antisense Sequence (5' → 3')</b> |
|---------------------------------|---------------------------------|-------------------------------------|
| <i>mGHR</i>                     | CTGCAAAGAATCAATCCAAGCC          | CAGTTCAGGGGAACGACACTT               |
| <i>mG6Pase</i>                  | CGACTCGCTATCTCCAAGTGA           | GTTGAACCAGTCTCCGACCA                |
| <i>mPEPCK</i>                   | CTGCATAACGGTCTGGACTTC           | CAGCAACTGCCCGTACTCC                 |
| <i>mPGC1<math>\alpha</math></i> | CAATGAATGCAGCGGTCTTA            | GTGTGAGGAGGGTCATCGTT                |
| <i>mPLIN5</i>                   | CAGAGCAAACACCGTACCCAG           | GGGATGGAAAGTAGGGCTAGG               |
| <i>mFoxO1</i>                   | TCAAGGATAAGGGCGACAGC            | TGTCCATGGACGCAGCTCTT                |
| <i>mPDK4</i>                    | AGGGAGGTCGAGCTGTTCTC            | GGAGTGTTCACTAAGCGGTCA               |
| <i>mGlut4</i>                   | GTGACTGGAACACTGGTCCTA           | CCAGCCACGTTGCATTGTAG                |
| <i>mATGL</i>                    | CAACGCCACTCACATCTACGG           | GGACACCTCAATAATGTTGGCAC             |
| <i>mHSL</i>                     | TCCCTCAGTATCTAGGCCAGA           | GGCTCATTTGGGAGACTTTGTTT             |
| <i>mRBP4</i>                    | AGTCAAGGAGAACTTCGACAAGG         | CAGAAAACCTCAGCGATGATGTTG            |
| <i>mAngptl6</i>                 | CTGGGCCGTCGTGTAGTAG             | CAGTCCTCTAGGAGTATCAGCAG             |
| <i>mHepassocin</i>              | CCCTGTCAGGAACTTTTCATCC          | CGGTAGTAAACACCGTTCAGGT              |
| <i>mAngptl8</i>                 | CCAGCCTGTCTGGAGATTCAG           | GTGGCTCTGCTTATCAGCTCG               |
| <i>mInhbe</i>                   | CTAACCAGCCGTCCCAGAATA           | GTGCCCCGAAAAGAGGGAG                 |
| <i>mEDA</i>                     | GTGGACGGCACCTACTTCATC           | CACCATCTTCACGGCGATTT                |
| <i>mFAM3C</i>                   | GGACTCAGCCATTCGTTCTAC           | GCTGCTCCACTAGCCATCTTAAA             |
| <i>mLECT2</i>                   | CCCACAACAATCCTCATTTCAGC         | ACACCTGGGTGATGCCTTTG                |
| <i>m Angptl4</i>                | CATCCTGGGACGAGATGAACT           | TGACAAGCGTTACCACAGGC                |
| <i>mEGFR</i>                    | GCATCATGGGAGAGAACAACA           | CTGCCATTGAACGTACCCAGA               |
| <i>mIGF1</i>                    | AAATCAGCAGCCTTCCAACCTC          | GCACTTCCTCTACTTGTGTTCTT             |
| <i>mFetuin B</i>                | TGCCAAGGTTCTACGGTCCA            | CAGCAGGGTTCTCATCTCCAG               |
| <i>mTSK</i>                     | TGCAGGGCATCCTCCATCTA            | GCCTGAAAACACCTCAGCTC                |
| <i>mApoJ</i>                    | ACAATGGCATGGTCCTGGGAGAG         | GTATGCTTCAGGCAGGGCTTGC              |
| <i>mHMGB1</i>                   | GCTGACAAGGCTCGTTATGAA           | CCTTTGATTTTGGGGCGGTA                |
| <i>mSHBG</i>                    | TCTGCTGTTGCTACTACTGATGC         | GGGCCATTGCTGAGGTACTTA               |
| <i>mSerpinf1</i>                | GCCCTGGTGCTACTCCTCT             | CGGATCTCAGGCGGTACAG                 |
| <i>mChemerin</i>                | GCTGATCTCCCTAGCCCTATG           | CCAATCACACCACTAACCACTTC             |
| <i>mSMOC1</i>                   | AATCCACAGGCTACTGTTGGT           | CATCGGCCTCTATGCTCTTGG               |
| <i>mAdropin</i>                 | CTCATCGCCATCGTCTGCAAT           | GGGACTGGATTCCGAGAGAGA               |
| <i>mFST</i>                     | TGCTGCTACTCTGCCAGTTC            | GTGCTGCAACACTCTTCCTTG               |

|                         |                         |                        |
|-------------------------|-------------------------|------------------------|
| <i>mDPP4</i>            | ACCGTGGAAGGTTCTTCTGG    | CACAAAGAGTAGGACTTGACCC |
| <i>mGpnmb</i>           | AGAAATGGAGCTTTGTCTACGTC | CTTCGAGATGGGAATGTATGCC |
| <i>mFetuin A</i>        | ATCCGCTCCACAAGGTACAG    | GGTCCAAAGCATGGCAAGT    |
| <i>mSelenoprotein P</i> | AGCCATTAAGATCGCTTACTGTG | GAGGGCTCCGCAGTTTTATTG  |
| <i>mGAPDH</i>           | ACATCATCCCTGCATCCACT    | GTCCTCAGTGTAGCCCAAG    |
| <i>hGHR</i>             | AATGCAGATATTCAGAAAGGAT  | ATAATTTCCAGAGTTTCGTTGT |
| <i>hRBP4</i>            | GAGTTCTCCGTGGACGAGAC    | TCCAGTGGTCATCATTTCTTTC |
| <i>hGAPDH</i>           | ATGGGGAAGGTGAAGGTCG     | GGGGTCATTGATGGCAACAATA |
| 18S                     | ACCGCACTAGGAATAATGGA    | CAAATGCTTTCGCTCTGGTC   |

---

**Figure S1. Fasting blood glucose are elevated in human and different mouse models of metabolic disorder**

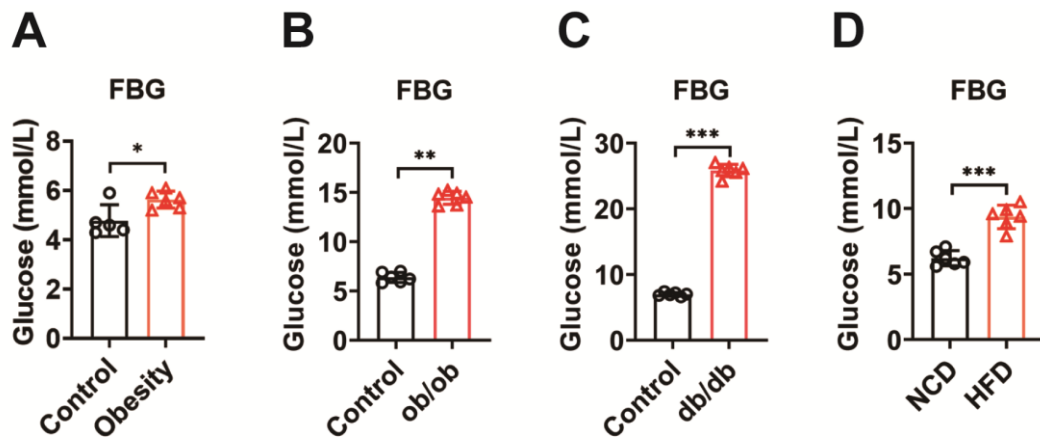

(A) Fasting blood glucose (FBG) levels examined after fasted for 12 h in control and obese humans (n=5-6). (B and C) Fasting blood glucose (FBG) levels examined after fasted for 12 h in *ob/ob* mice (B, n=6) or *db/db* mice (C, n=6), respectively. (D) FBG levels examined after fasted for 12 h in the mice fed with NCD or HFD for 12 weeks (n=6). Data are expressed as the mean  $\pm$  SD. \* $p < 0.05$ ; \*\* $p < 0.01$ ; \*\*\* $p < 0.001$  (Student's *t*-test).

**Figure S2. Body weight and blood glucose levels are reduced in GHR-KO mice**

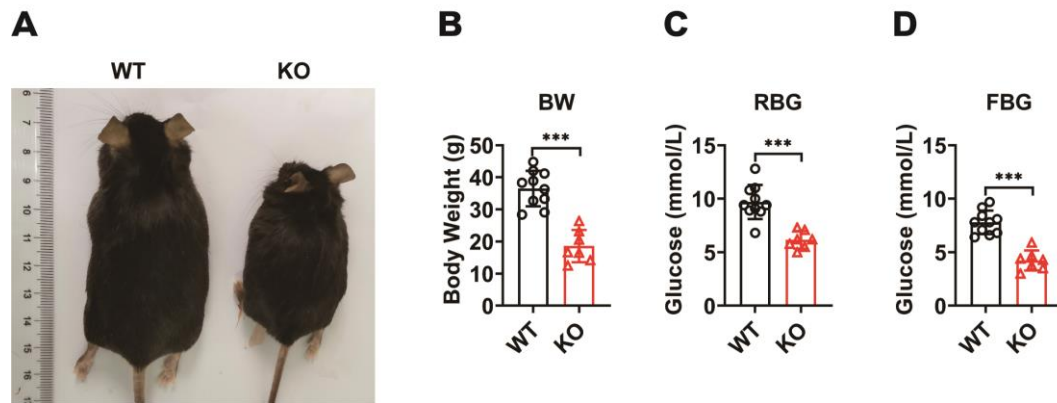

(A and B) Representative photograph (A) and body weight (B, n=7-10) of 12-week-old male GHR<sup>-/-</sup> (KO) mice, littermate wild-type (WT) mice used as the control group. (C and D) The RBG (C, n=7-10) and FBG (D, n=7-10) levels of GHR-WT or GHR-KO mice. Data are expressed as the mean  $\pm$  SD. \*\*\* $p < 0.001$  (Student's *t*-test).

**Figure S3. Hepatic gluconeogenesis and insulin sensitivity are improved in the livers of GHR-KO mice**

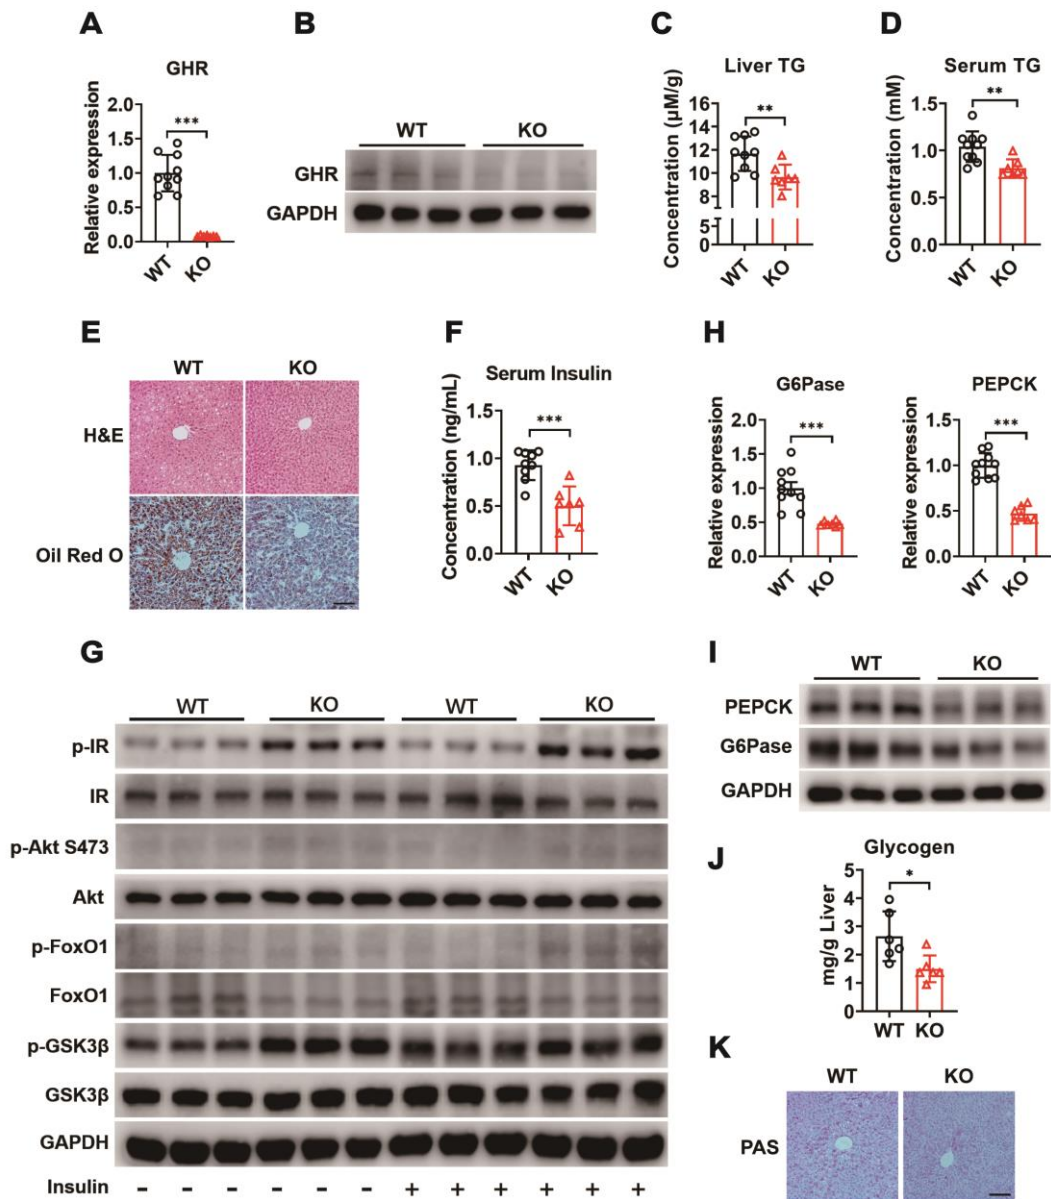

(A and B) Relative mRNA levels (A, n=7-10) and protein levels (B) of GHR in the livers of GHR-WT or GHR-KO mice. (C and D) The TG levels in the livers (C, n=7-9) and serum (D, n=7-10) of GHR-WT or GHR-KO mice. (E) Representative images of H&E staining (up) and Oil Red O staining (down) of liver sections from GHR-WT (left) or GHR-KO (right) mice. Scale bar, 500 μm. (F) The serum insulin levels of GHR-WT or GHR-KO mice (n=7-9). (G) Western blots analysis of phosphorylated key molecules of insulin signaling pathway in the livers of GHR-WT or GHR-KO mice after insulin administration. (H and I): Relative mRNA levels (H, n=7-10) and protein levels (I) of gluconeogenesis-related genes or proteins in the livers of GHR-WT or GHR-KO mice, respectively. (J) The amount of glycogen of GHR-WT or



GHR-KO mice normalized based on liver weight (n=6). (K) Representative images of PAS staining of liver sections from GHR-WT (left) or GHR-KO (right) mice. Scale bar, 500  $\mu$ m. Data are expressed as the mean  $\pm$  SD. \* $p$  < 0.05; \*\* $p$  < 0.01; \*\*\* $p$  < 0.001 (Student's  $t$ -test).

**Figure S4. Hepatic GHR overexpression induces skeletal muscle atrophy and white fat accumulation**

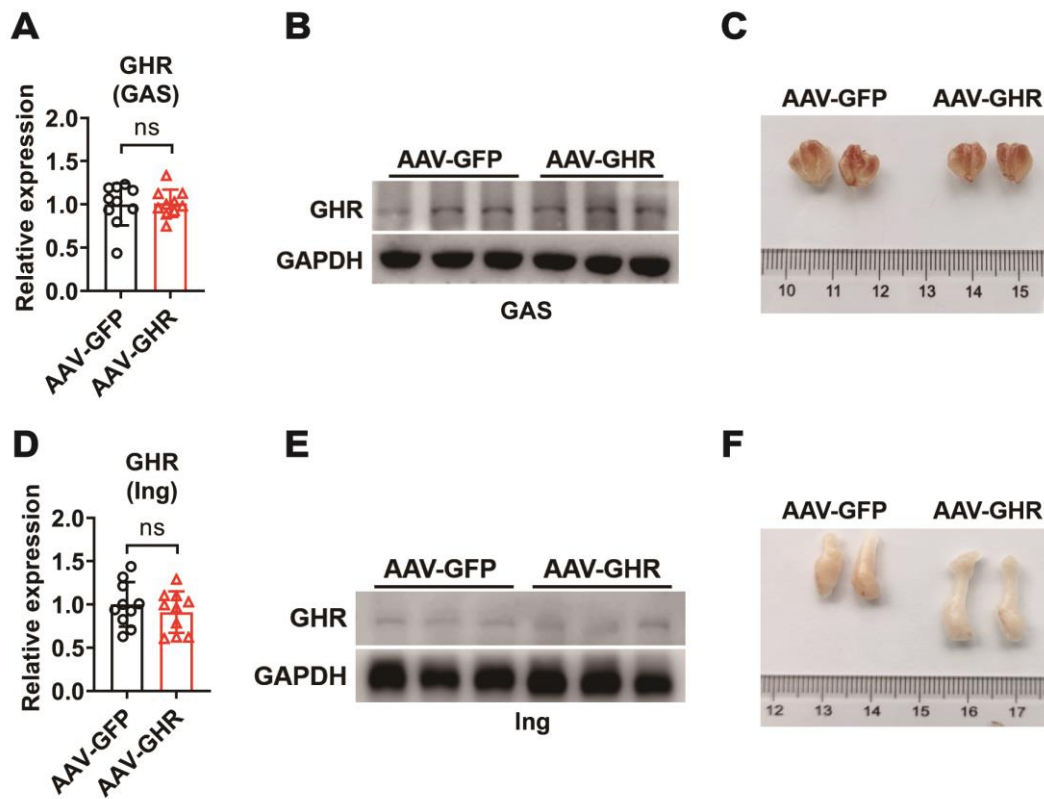

(A and B) Relative mRNA levels (A, n=10) and protein levels (B) of GHR in the GAS of AAV-infected mice. (C) Representative GAS photograph of AAV-infected mice. (D and E) Relative mRNA levels (D, n=10) and protein levels (E) of GHR in the Ing of AAV-infected mice. (F) Representative Ing photograph of AAV-infected mice. Data are expressed as the mean  $\pm$  SD. ns, no significant (Student's *t*-test).

**Figure S5. The level of RBP4 is reduced in the serum of GHR-KO mice**

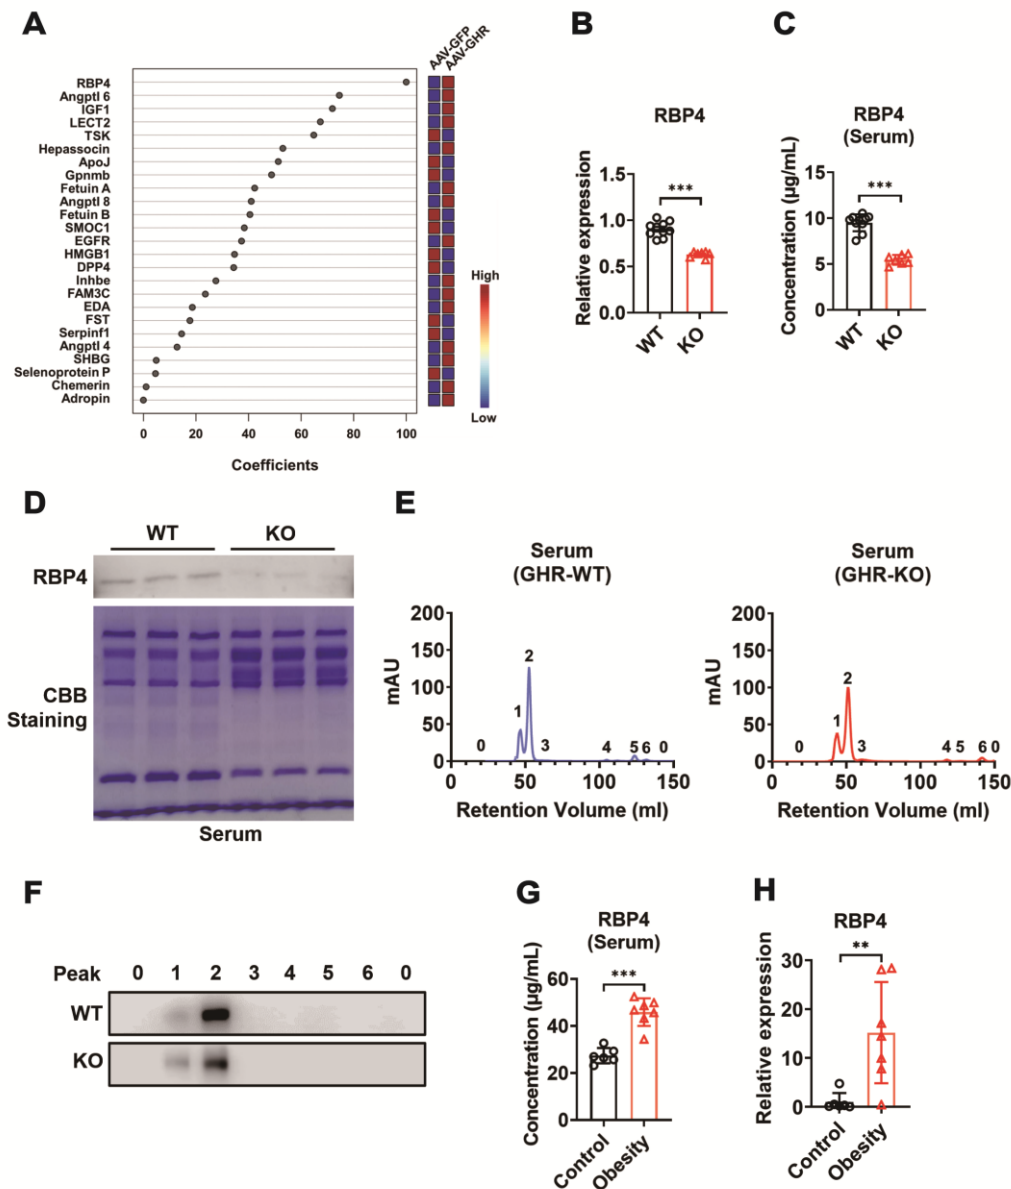

(A) The partial least squares-discriminant analysis (PLS-DA) of hepatokines were performed and the coefficients of them were shown as indicated. (B) Relative mRNA levels of RBP4 in the livers of GHR-WT or GHR-KO mice (n=7-10). (C) The concentrations of serum RBP4 of GHR-WT or GHR-KO mice (n=7-10). (D) Western blot and SDS-PAGE analysis were performed in the serum of GHR-WT or GHR-KO mice. (E) Elution profile of chylomicrons in the serum of GHR-WT (left) or GHR-KO (right) mice. Purified proteins were detected in column eluents by monitoring absorbance at 280 nm. (F) Western blots of RBP4 in serum of GHR-WT (up) or GHR-KO (down) mice, which were separated by gel filtration chromatography and collected according to ultraviolet absorption peak of fractions. (G) The concentrations of serum RBP4 of human (n=6-7). (H) Relative mRNA levels of RBP4 in the livers of

human (n=6-7). Data are expressed as the mean  $\pm$  SD. \*\* $p < 0.01$ , \*\*\* $p < 0.001$  (Student's  $t$ -test).

**Figure S6. The inhibition of GHR induces depressed transcriptional activity of RBP4**

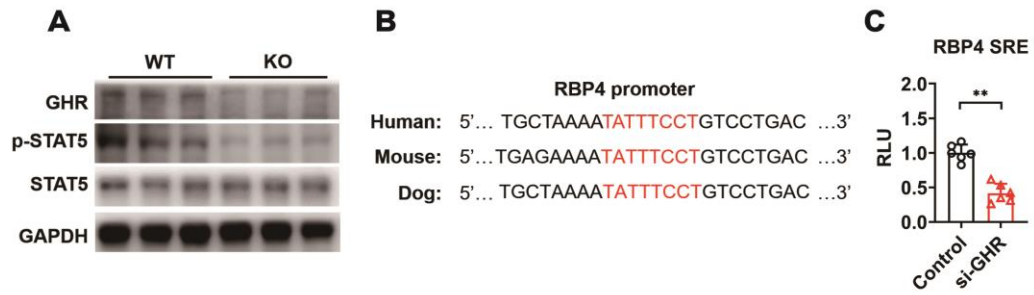

(A) Western blots analysis of GHR, p-SAT5 and STAT5 in the livers of GHR-WT or GHR-KO mice. (B) Sequence alignment of RBP4 promoter from various species. (C) The HepG2 cells were cotransfected with siGHR and RBP4 SRE reporter plasmids. Luciferase activity was analyzed after transfection for 48 h (n=6). Data are expressed as the mean  $\pm$  SD. \*\* $p < 0.01$  (Student's  $t$ -test).

**Figure S7. The inhibition of HIF1 $\alpha$  induces depressed RBP4 expression**

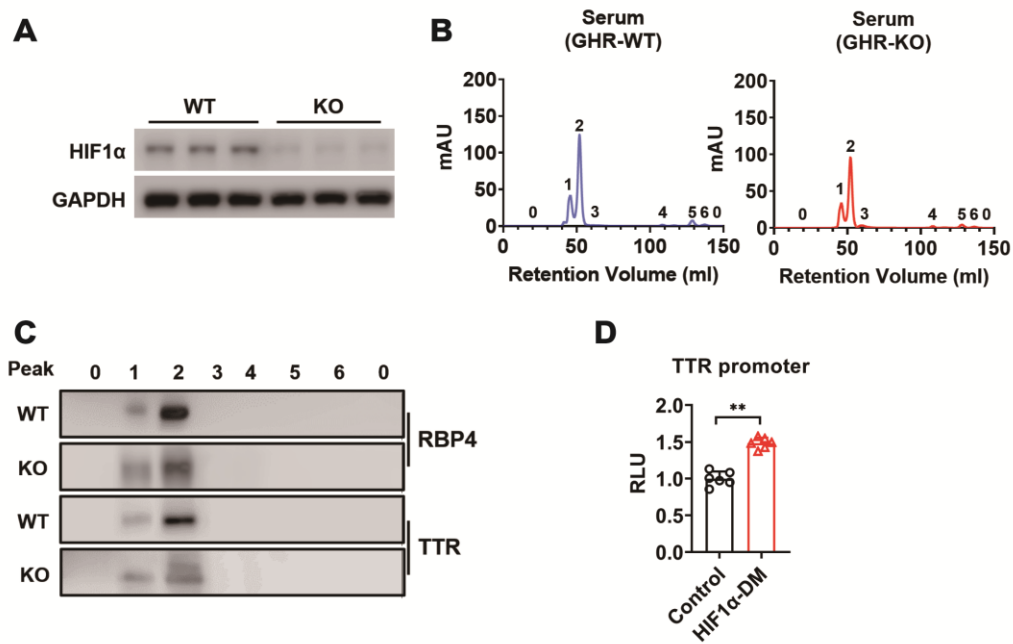

(A) Western blots analysis of HIF1 $\alpha$  in the livers of GHT-WT or GHR-KO mice. (B) Elution profile of chylomicrons in the serum of GHR-WT (left) or GHR-KO (right) mice. Purified proteins were detected in column eluents by monitoring absorbance at 280 nm. (C) Western blots of RBP4 and TTR in serum of GHR-WT or GHR-KO mice, which were separated by gel filtration chromatography and collected according to ultraviolet absorption peak of fractions. (D) The HepG2 cells were cotransfected with HIF1 $\alpha$ -DM and TTR promoter reporter plasmids. Luciferase activity was analyzed after transfection for 48 h (n=6). Data are expressed as the mean  $\pm$  SD. \*\* $p$  < 0.01 (Student's  $t$ -test).

**Figure S8. Uncropped scans of the Western blots shown in Figures as indicated.**

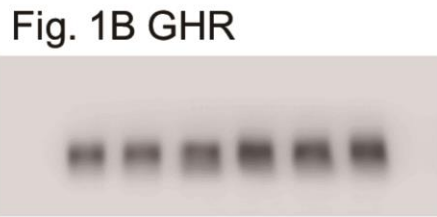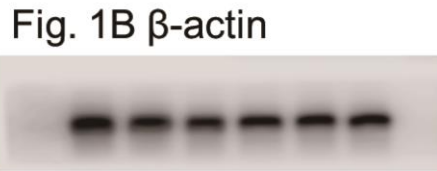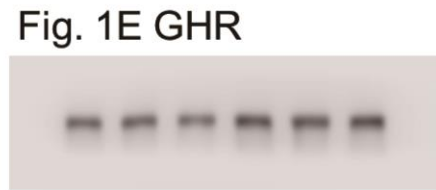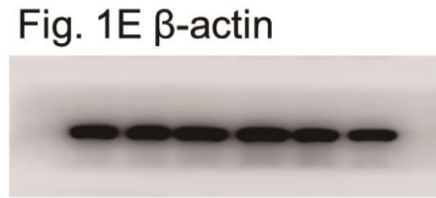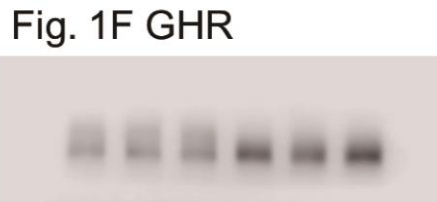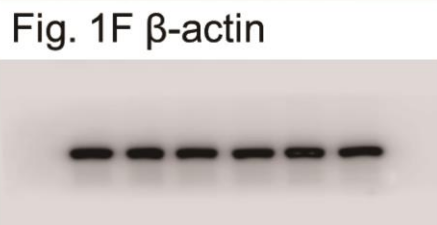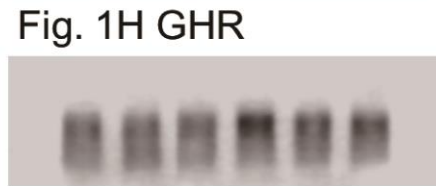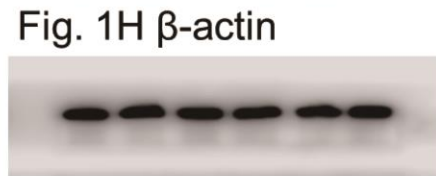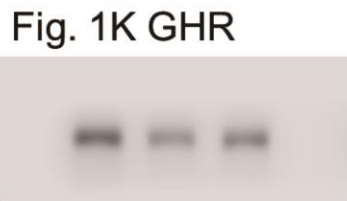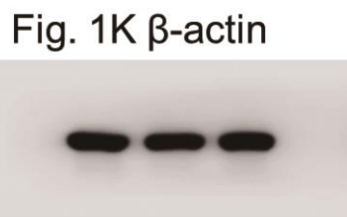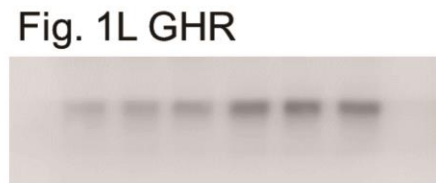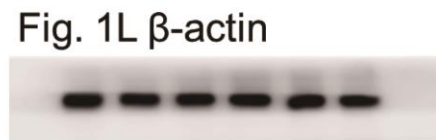

Fig. 3B GHR

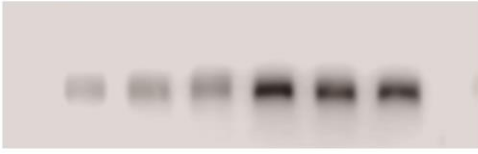

Fig. 3B  $\beta$ -actin

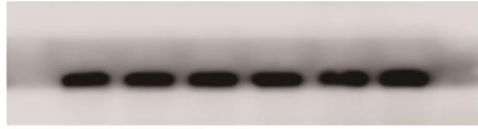

Fig. 3I p-IR

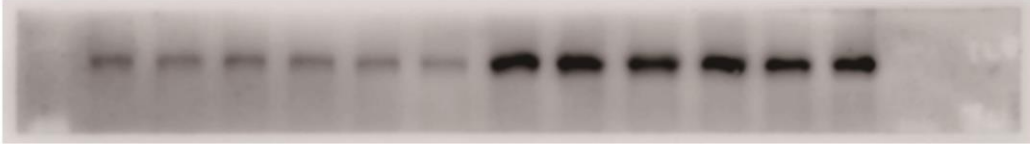

Fig. 3I IR

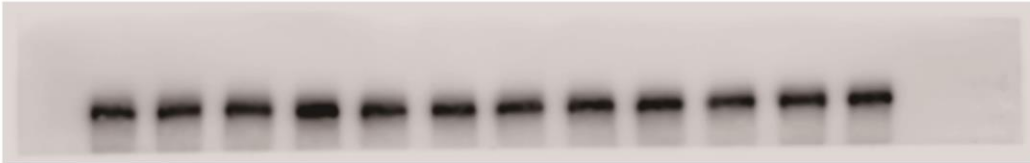

Fig. 3I p-Akt S473

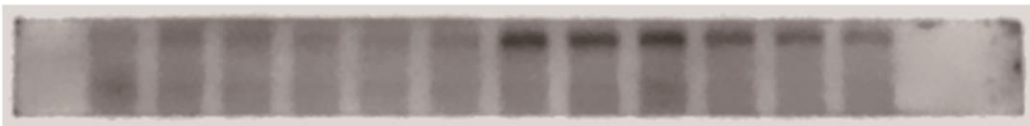

Fig. 3I Akt

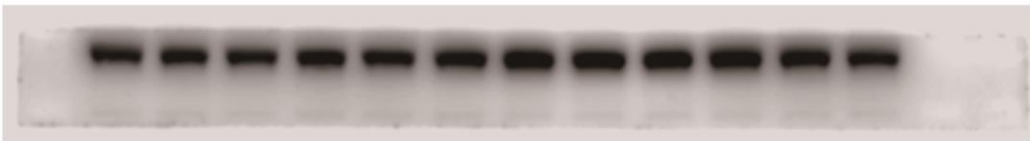

Fig. 3I p-FoxO1

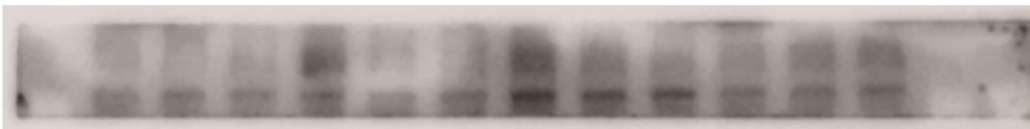

Fig. 3I FoxO1

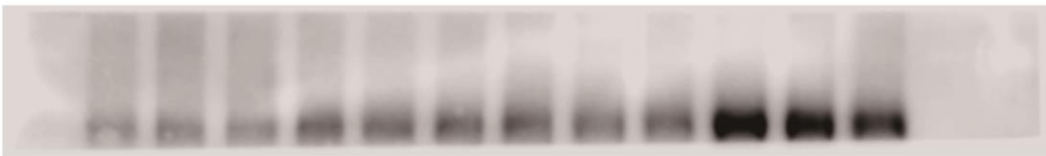



Fig. 3I p-GSK3 $\beta$

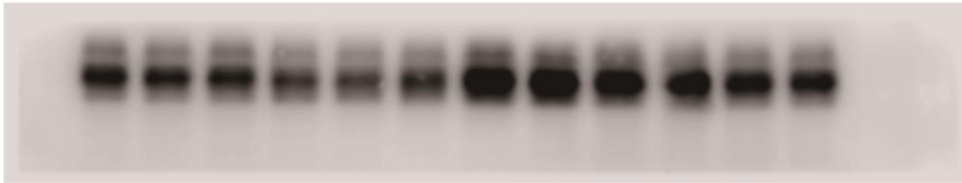

Fig. 3I GSK3 $\beta$

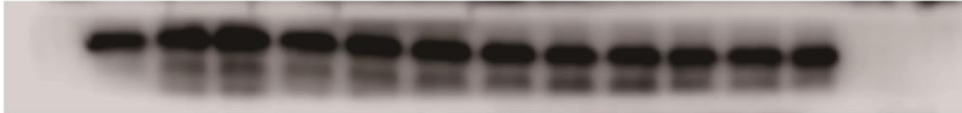

Fig. 3I  $\beta$ -actin

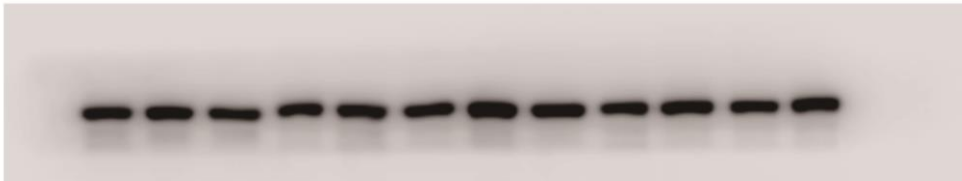

Fig. 3K PEPCK

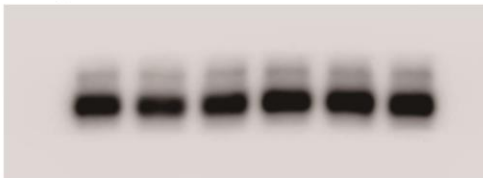

Fig. 3K G6Pase

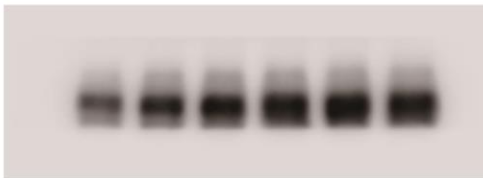

Fig. 3K  $\beta$ -actin

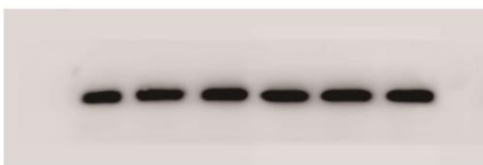

Fig. S3B GHR

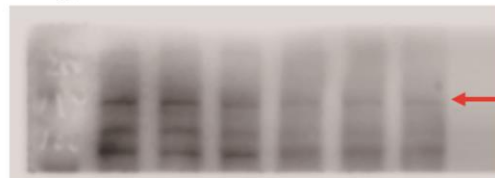

Fig. S3B GAPDH

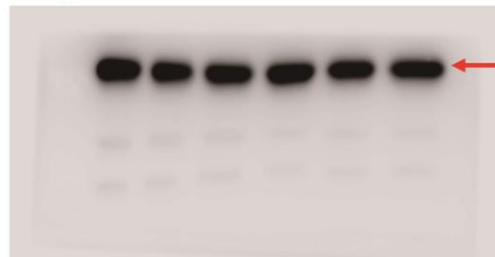

Fig. S3G p-IR

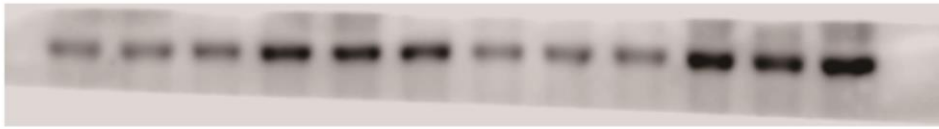

Fig. S3G IR

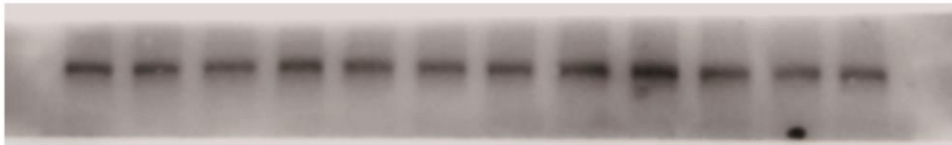

Fig. S3G p-Akt S473

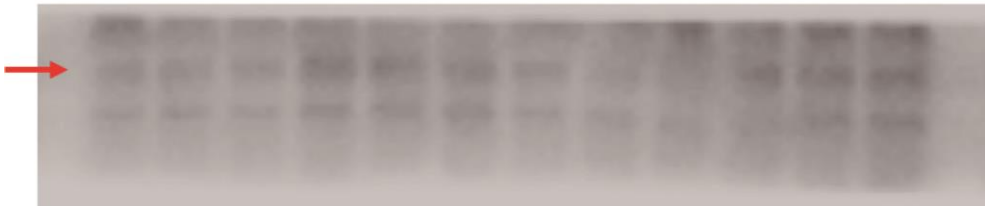

Fig. S3G Akt

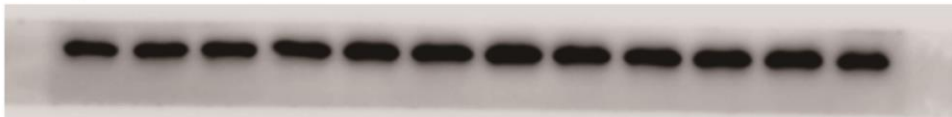

Fig. S3G p-FoxO1

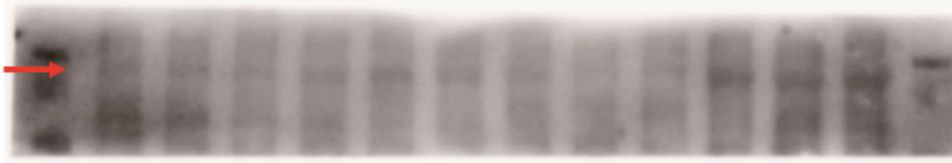

Fig. S3G FoxO1

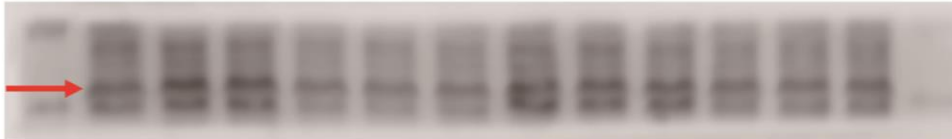

Fig. S3G p-GSK3β

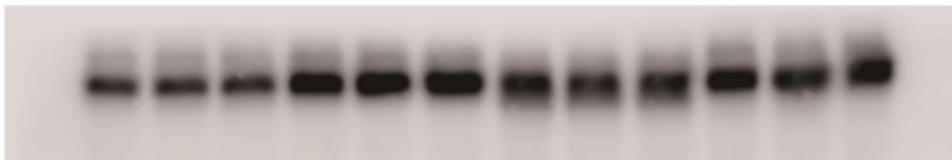

Fig. S3G GSK3β

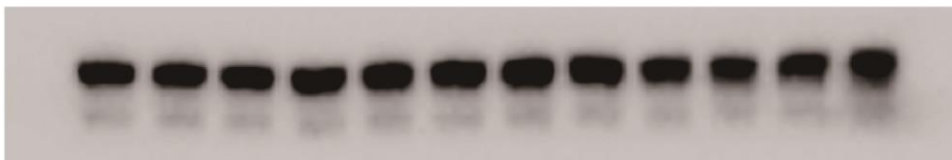

Fig. S3G GAPDH

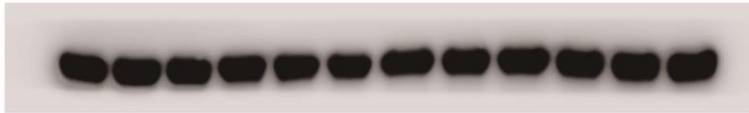

Fig. S3I PEPCK

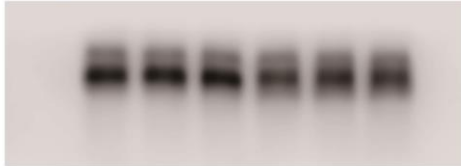

Fig. S3I GAPDH

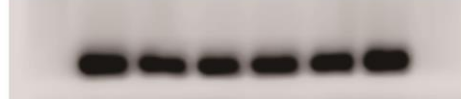

Fig. S3I G6Pase

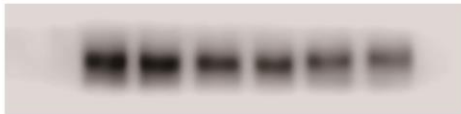

Fig. 4F FoxO1

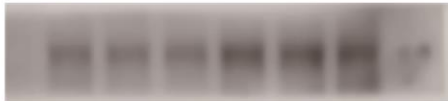

Fig. 4L HSL

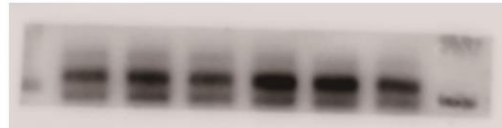

Fig. 4F PDK4

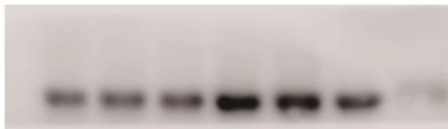

Fig. 4L ATGL

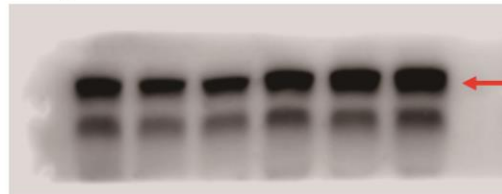

Fig. 4F P-PDH

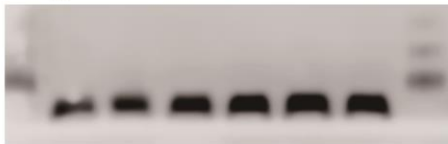

Fig. 4L  $\beta$ -actin

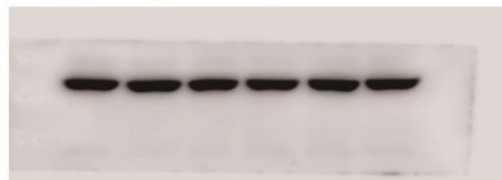

Fig. 4F PDH

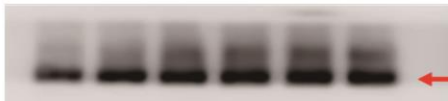

Fig. 4F  $\beta$ -actin

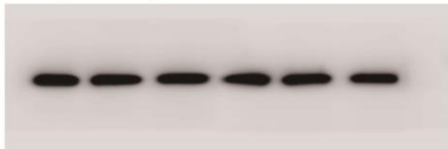

Fig. 4M p-IR

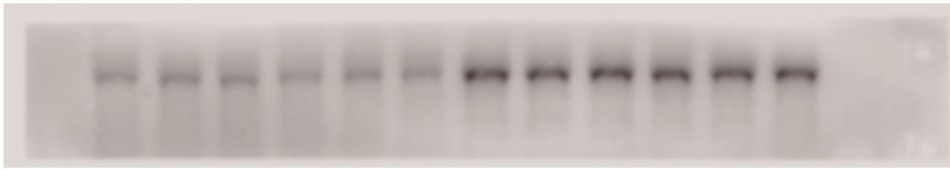

Fig. 4M IR

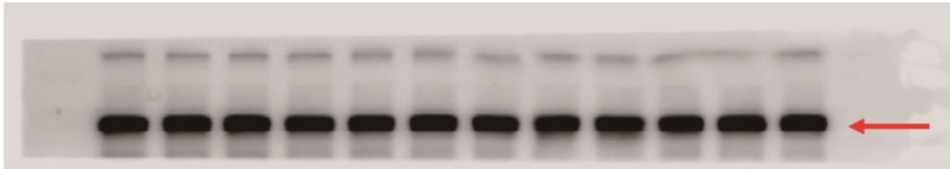

Fig. 4M p-Akt S473

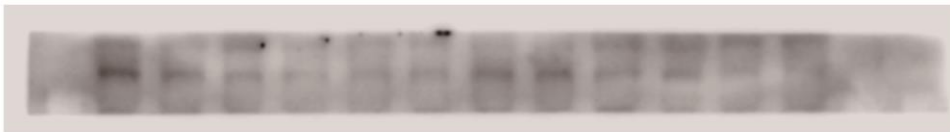

Fig. 4M Akt

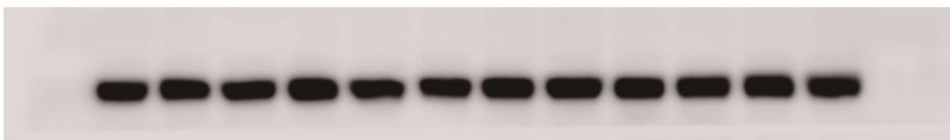

Fig. 4M p-FoxO1

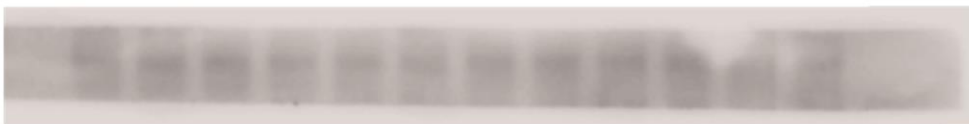

Fig. 4M FoxO1

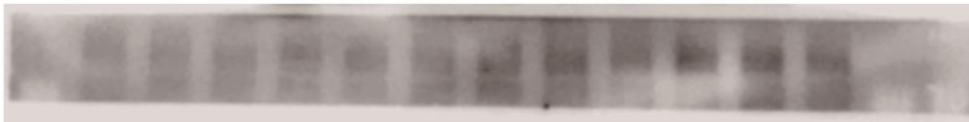

Fig. 4M p-GSK3 $\beta$

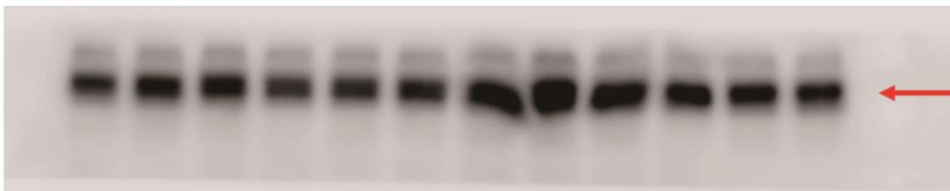

Fig. 4M GSK3 $\beta$

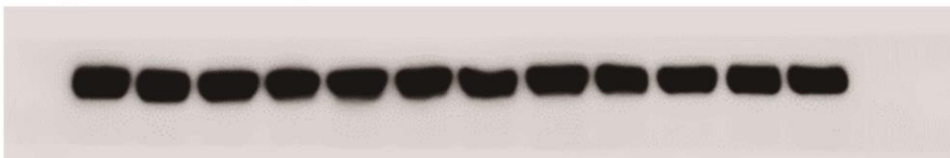

Fig. 4M  $\beta$ -actin

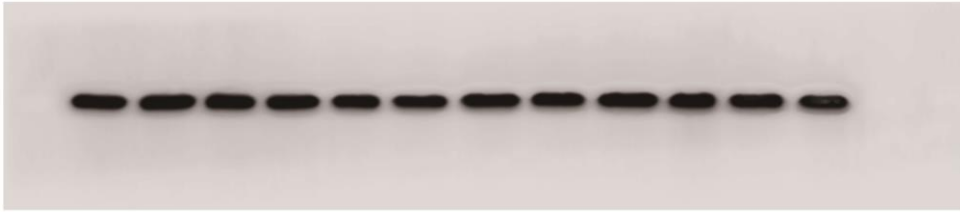

Fig. 4N p-IR

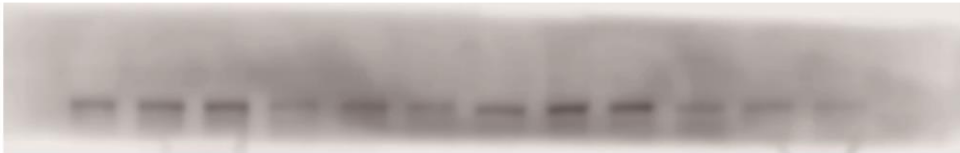

Fig. 4N IR

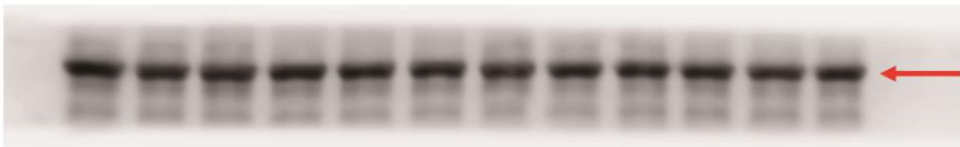

Fig. 4N p-Akt S473

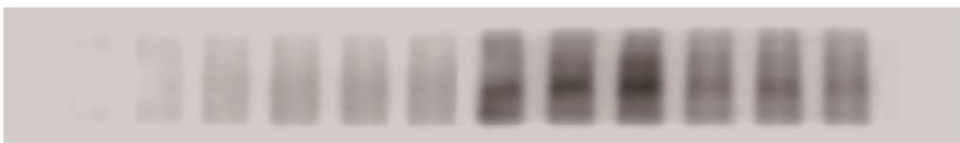

Fig. 4N Akt

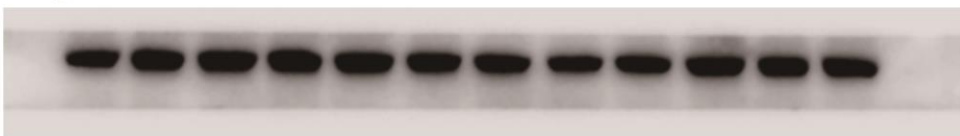

Fig. 4N p-FoxO1

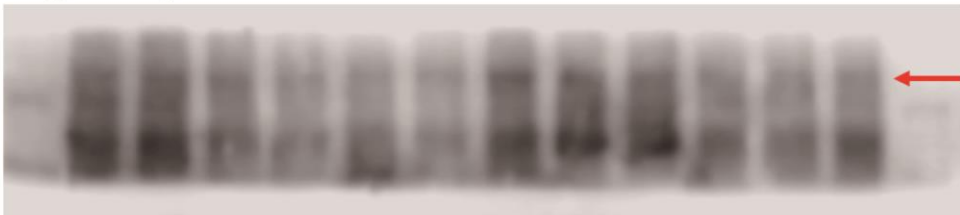

Fig. 4N FoxO1

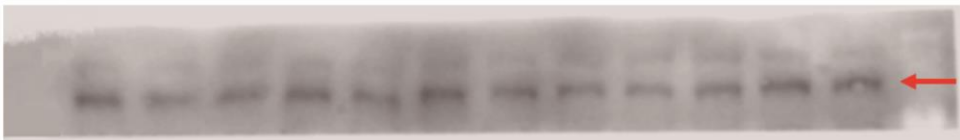

Fig. 4N p-GSK3 $\beta$

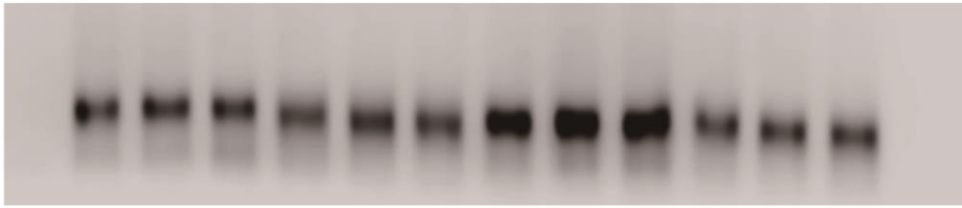

Fig. 4N GSK3 $\beta$

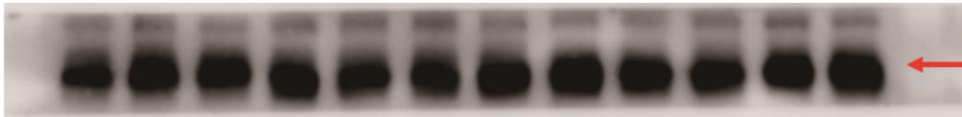

Fig. 4N  $\beta$ -actin

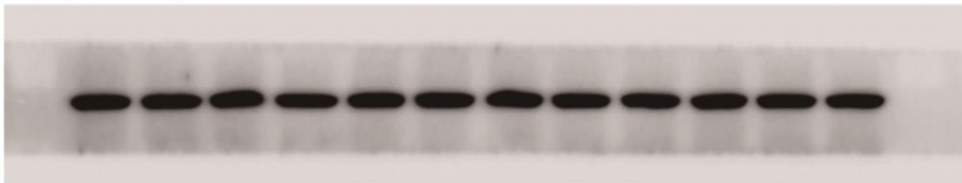

Fig. S4B GHR

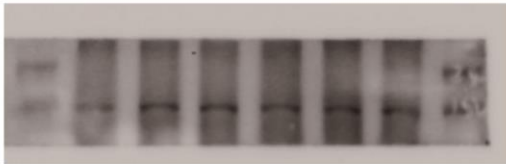

Fig. S4B GAPDH

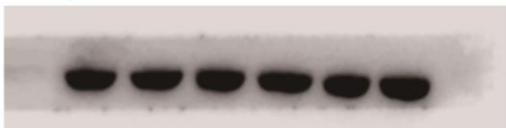

Fig. S4E GHR

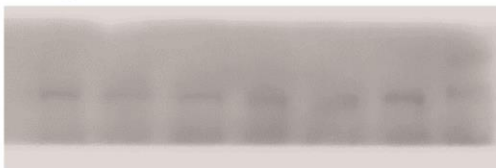

Fig. S4E GAPDH

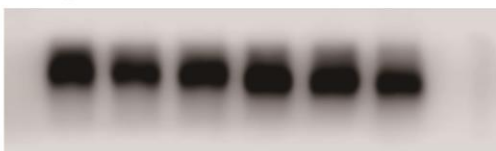

Fig. 5D RBP4

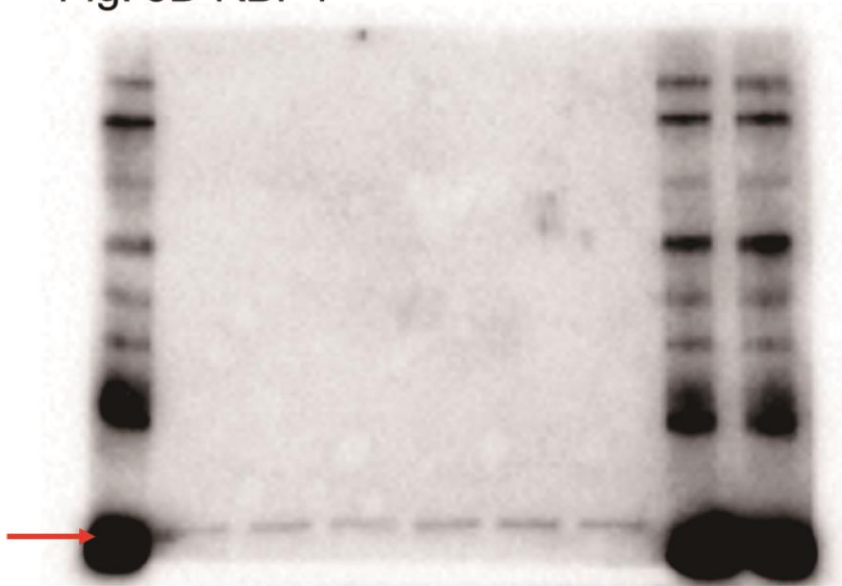

Fig. 5D CBB Staining

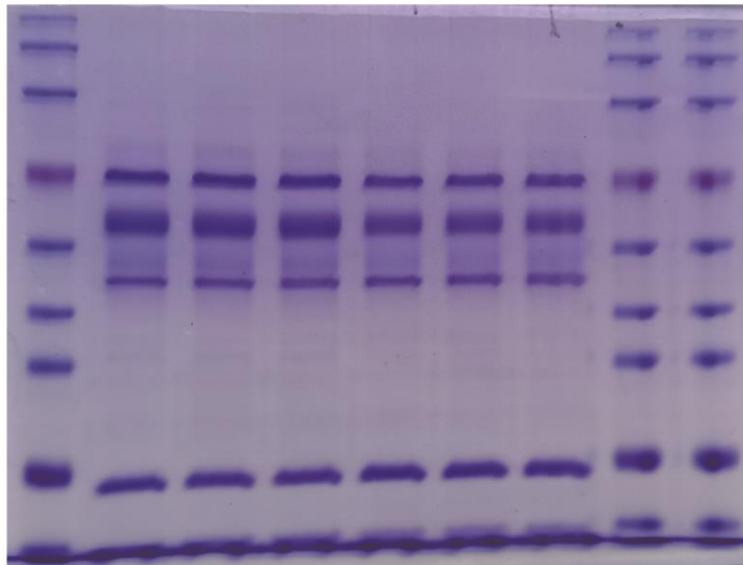

Fig. 5F AAV-GFP

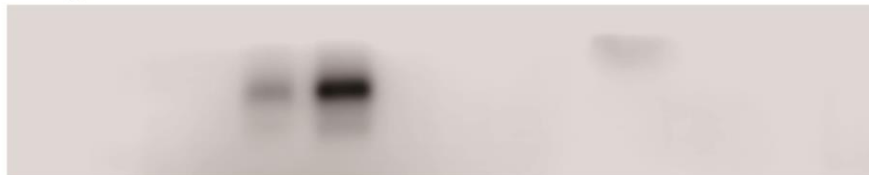

Fig. 5F AAV-GHR

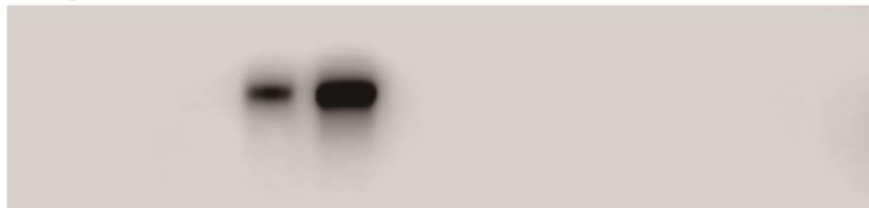

Fig. S5D RBP4

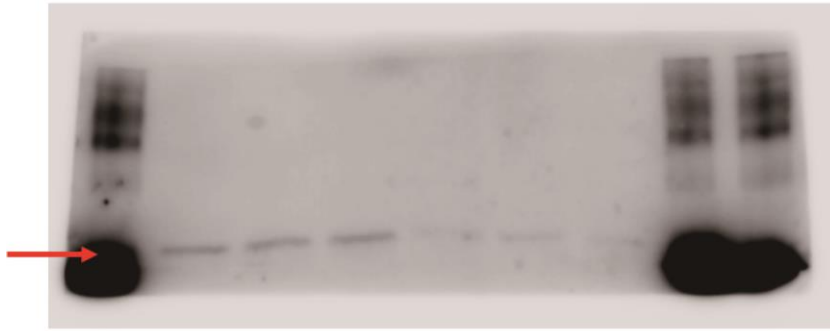

Fig. S5D CBB Staining

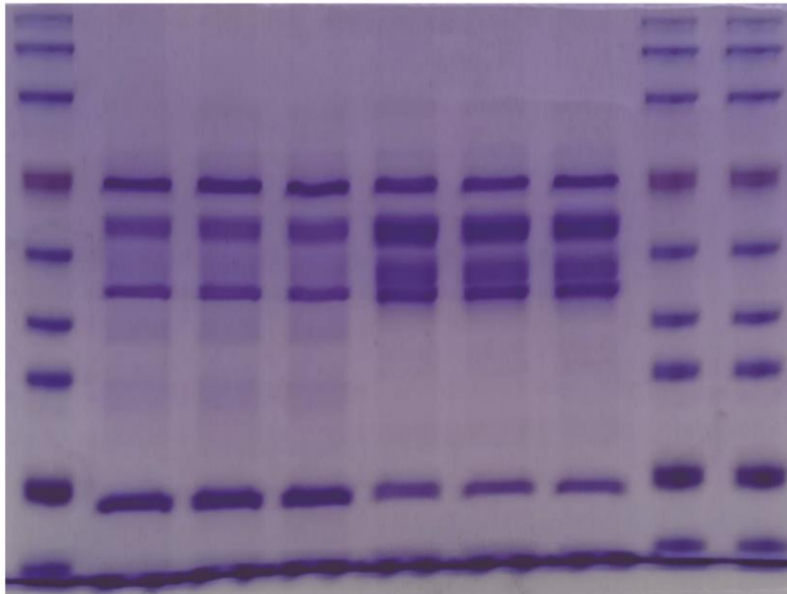

Fig. S5F WT

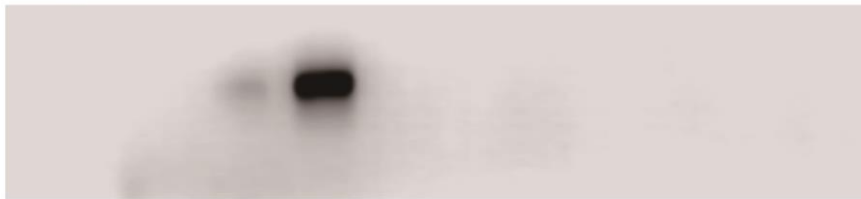

Fig. S5F KO

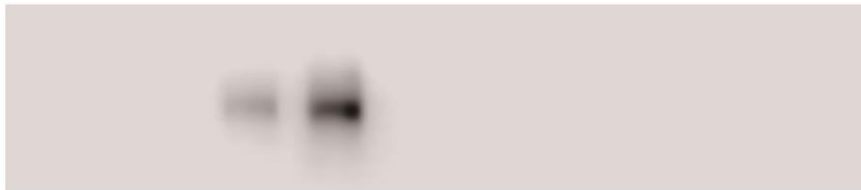



Fig. 6A GHR

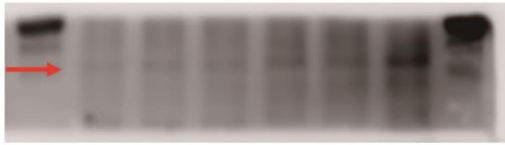

Fig. 6A p-STAT5

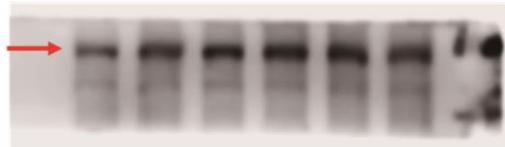

Fig. 6A STAT5

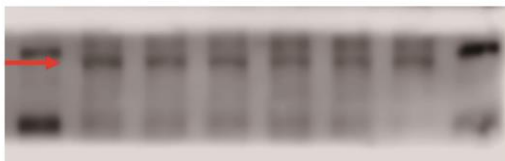

Fig. 6A  $\beta$ -actin

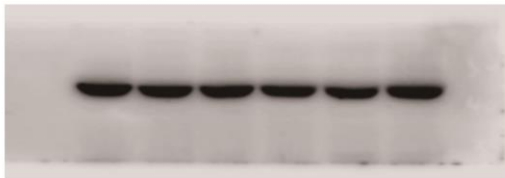

Fig. 6C GHR

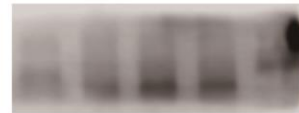

Fig. 6C p-STAT5

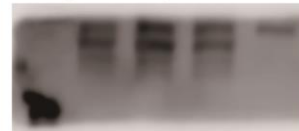

Fig. 6C STAT5

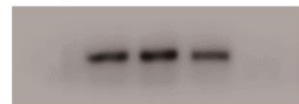

Fig. 6C  $\beta$ -actin

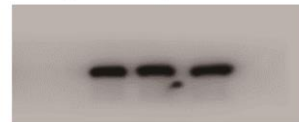

Fig. 6E GHR

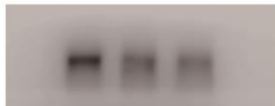

Fig. 6E p-STAT5

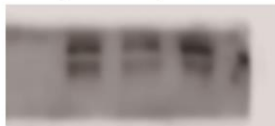

Fig. 6E STAT5

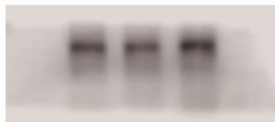

Fig. 6E  $\beta$ -actin

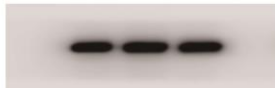

Fig. S6A GHR

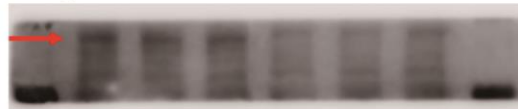

Fig. S6A p-STAT5

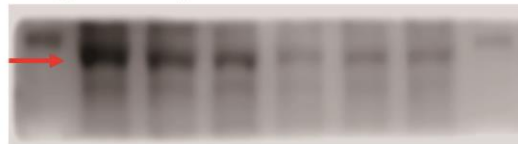

Fig. S6A STAT5

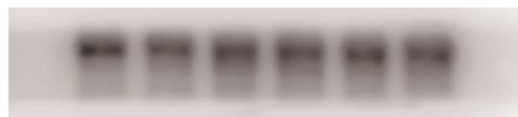

Fig. S6A GAPDH

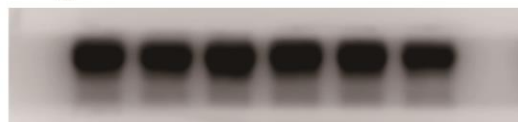

Fig. 7A GHR

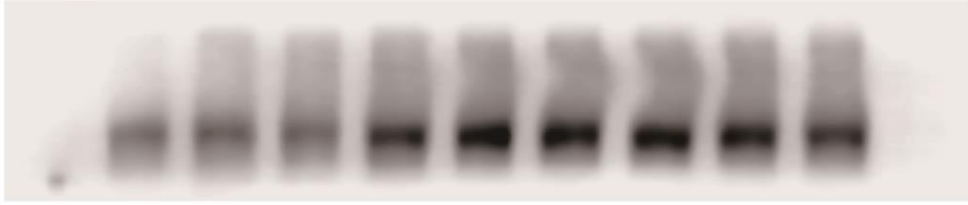

Fig. 7A p-STAT5

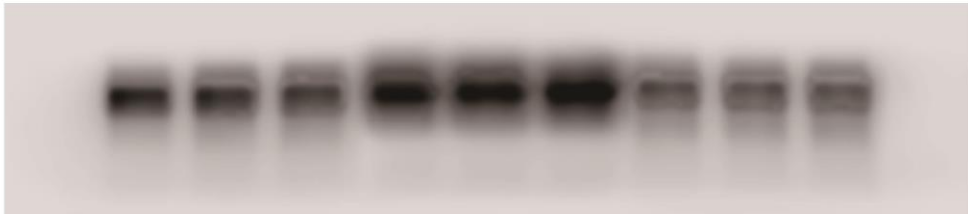

Fig. 7A STAT5

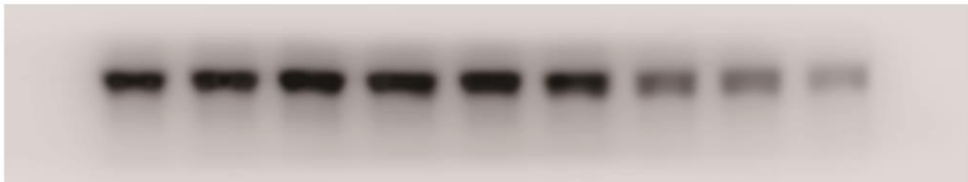

Fig. 7A  $\beta$ -actin

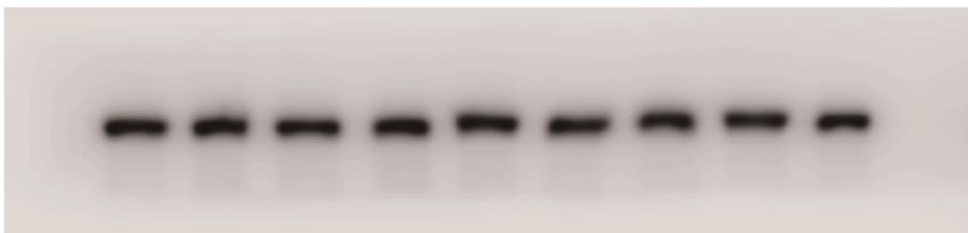

Fig. 7E AAV-GFP-RBP4

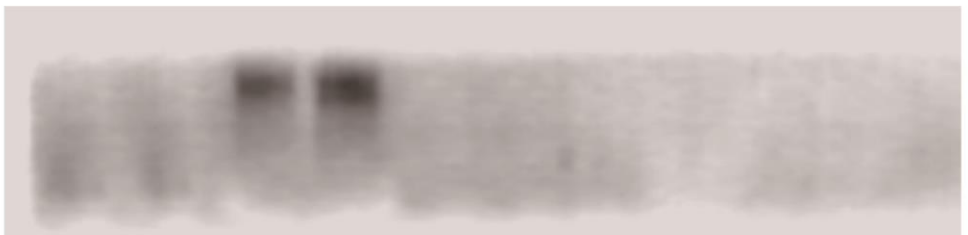

Fig. 7E AAV-GHR-RBP4

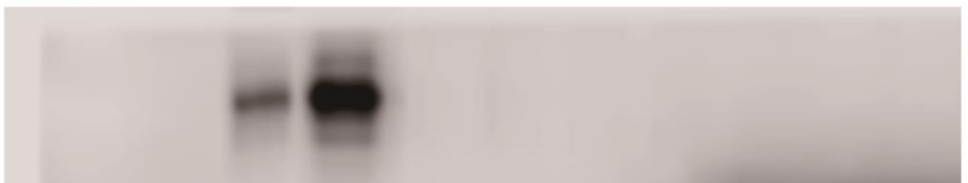

Fig. 7E AAV-GFP-TTR

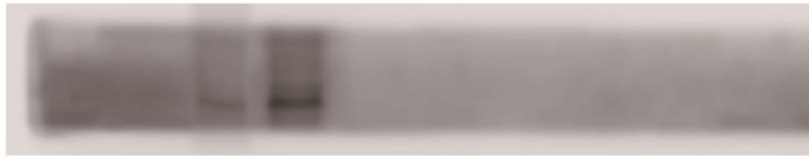

Fig. 7E AAV-GHR-TTR

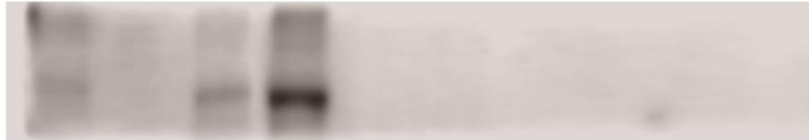

Fig. 7F HIF1 $\alpha$

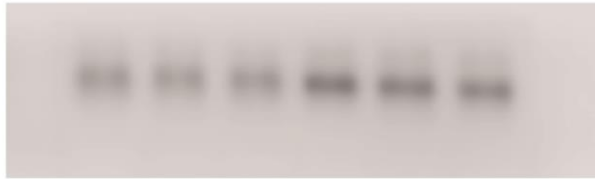

Fig. 7F  $\beta$ -actin

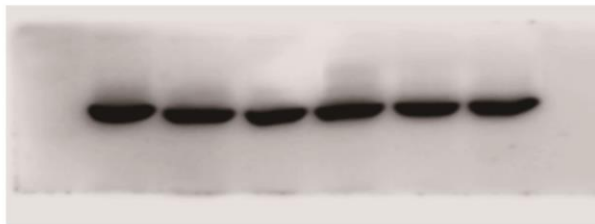

Fig. 7H GHR

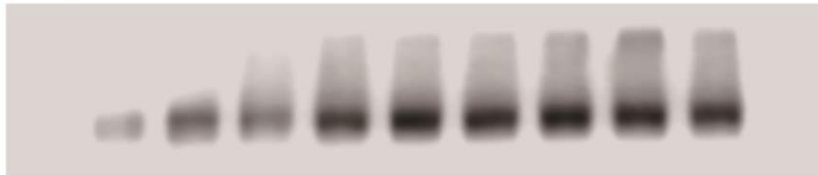

Fig. 7H TTR

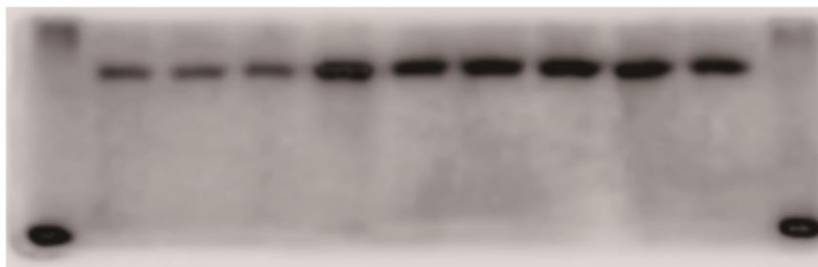

Fig. 7H HIF1 $\alpha$

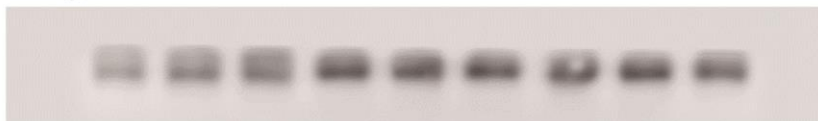

Fig. 7H  $\beta$ -actin

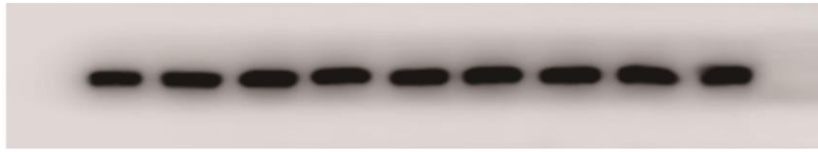

Fig. S7A HIF1 $\alpha$

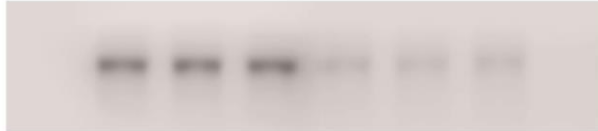

Fig. S7A GAPDH

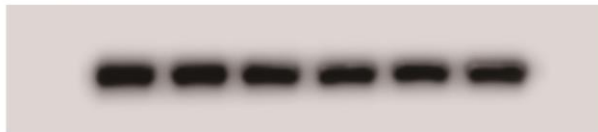

Fig. S7C WT-RBP4

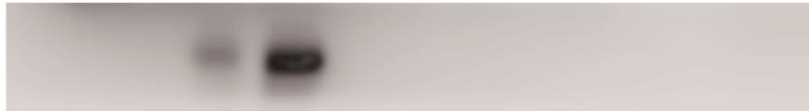

Fig. S7C KO-RBP4

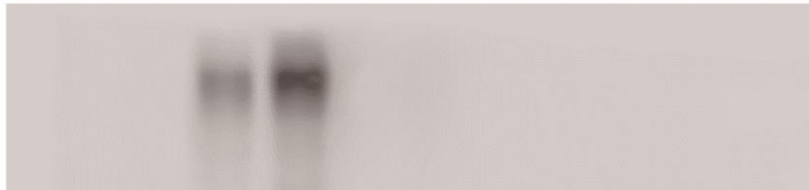

Fig. S7C WT-TTR

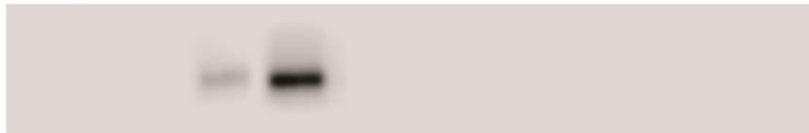

Fig. S7C KO-TTR

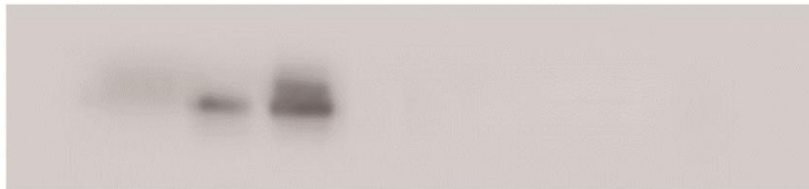

Supplement: thnov11p8283s1.pdf [file thnov11p8283s1.pdf]
